# Supplementary material for: Synergistic interplay of ionic liquid and dodecyl sulphate driving the oxidation state of polypyrrole based electrodes
Source: Royal Society of Chemistry journal article supplement (doi:10.1039/c8nj02431f), 2018-01-01
Supplement: c8nj02431f1.pdf [file c8nj02431f1.pdf]

**Supporting Information**

**Synergistic interplay of ionic liquid and  
dodecyl sulphate driving the oxidation state of  
Polypyrrole based electrodes**

*Lara F. Loguercio,<sup>a</sup> Carolina de Matos,<sup>a,b</sup> Matheus C. de Oliveira,<sup>a</sup> Graciane Marin,<sup>a</sup> Sherdil Khan,<sup>c</sup>*

*Naira M. Balzaretti,<sup>c</sup> Jairton Dupont,<sup>a</sup> Marcos J. L. Santos,<sup>a\*</sup> Jacqueline F. L. Santos,<sup>a\*</sup>*

*<sup>a</sup>Instituto de Química, Universidade Federal do Rio Grande do Sul, CEP 91501-970,  
Porto Alegre, RS, Brazil*

*<sup>b</sup>Campus Caçapava do Sul, Universidade Federal do Pampa, CEP 96570-000,  
Caçapava do Sul, RS, Brazil*

*<sup>c</sup>Instituto de Física, Universidade Federal do Rio Grande do Sul, CEP 91501-970,  
Porto Alegre, RS, Brazil*

**Corresponding authors**

\*E-mails: [jacqueline.ferreira@ufrgs.br](mailto:jacqueline.ferreira@ufrgs.br); [mjls@ufrgs.br](mailto:mjls@ufrgs.br)

Supplementary results (Figures S1 –S5).

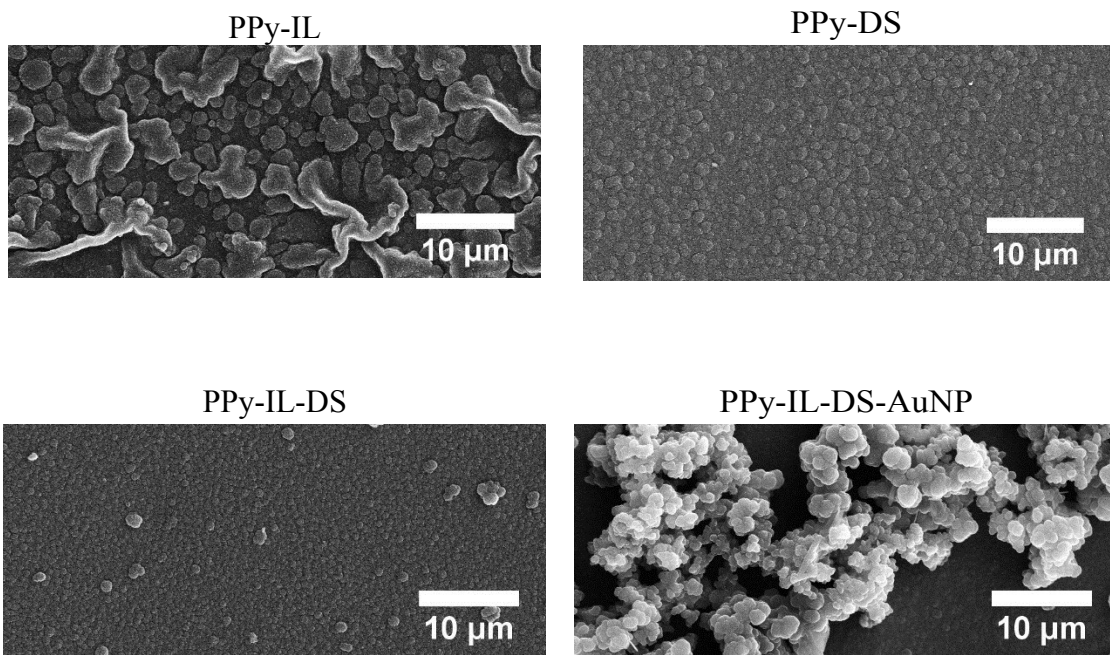

**Figure S1.** SEM images of PPy-IL, PPy-DS, PPy-IL-DS and PPy-IL-DS-AuNP films.

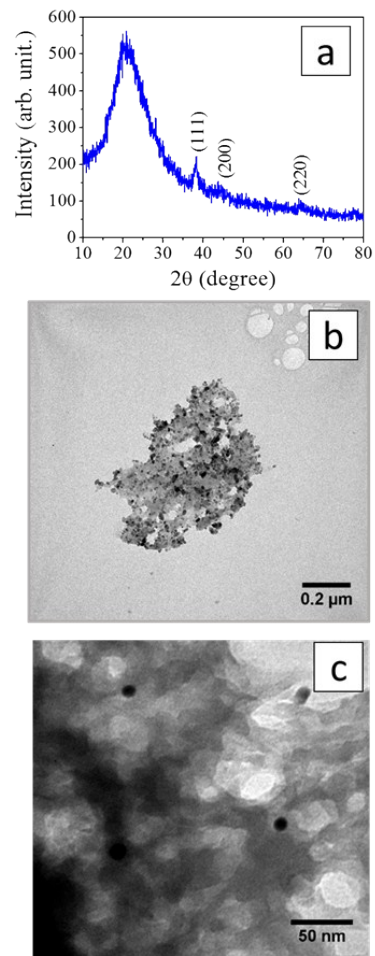

**Figure S2.** (a) X-ray diffraction and (b and c) TEM image of the PPy-IL-DS-AuNP film.

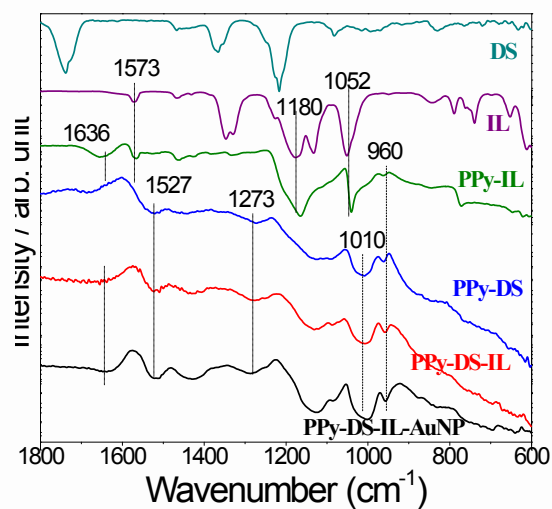

**Figure S3.** FTIR-ATR spectra of PPy-IL, PPy-DS, PPy-IL-DS, PPy-IL-DS-AuNP films, IL and pristine DS surfactant.

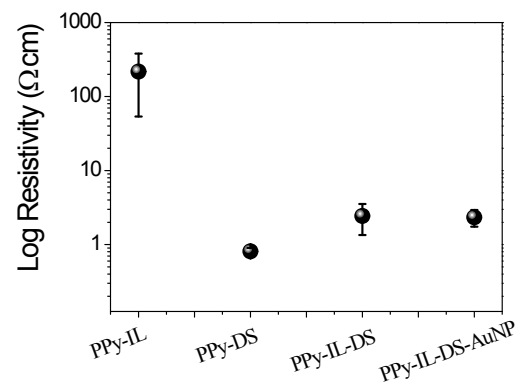

**Figure S4.** Resistivity of PPy-IL, PPy-DS, PPy-IL-DS and PPy-IL-DS-AuNP films.

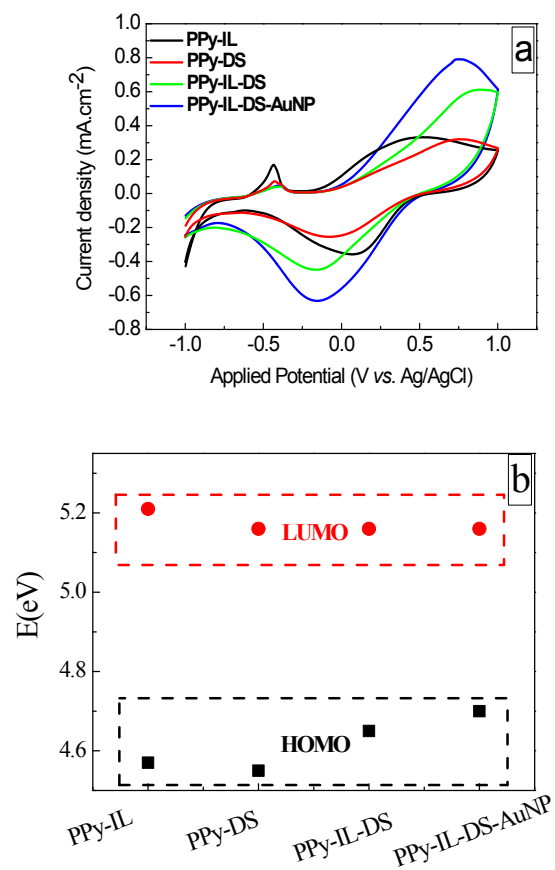

**Figure S5.** (a) Voltammograms of PPy-IL, PPy-DS, PPy-IL-DS, PPy-IL-DS-AuNP in 0.1 mol L<sup>-1</sup> LiClO<sub>4</sub> solution at a scan rate of 30 mV s<sup>-1</sup>; (b) Electrochemical band gap calculated by cyclic voltammetry (Onset).
